# Supplementary material for: Donor polymer based on alkylthiophene side chains for efficient non-fullerene organic solar cells: insights into fluorination and side chain effects on polymer aggregation and blend morphology
Source: Royal Society of Chemistry journal article supplement (doi:10.1039/c8ta08769e), 2018-01-01
Supplement: c8ta08769e1.pdf [file c8ta08769e1.pdf]

## Supplementary Information

### **Donor polymer based on alkylthiophene side chains for efficient non-fullerene organic solar cells: Insights into fluorination and side chain effects on polymer aggregation and blend morphology**

Jing Liu<sup>1,2†</sup>, Lik-Kuen Ma<sup>2†</sup>, Zhengke Li<sup>3†</sup>, Huawei Hu<sup>4</sup>, Fu Kit Sheong<sup>2</sup>, Guangye Zhang<sup>1,2</sup>, Harald Ade<sup>4</sup>, and He Yan<sup>1,2\*</sup>

<sup>1</sup> The Hong Kong University of Science and Technology-Shenzhen Research Institute No. 9 Yuxing 1st RD, Hi-tech Park, Nanshan Shenzhen 518057, China

<sup>2</sup> Department of Chemistry and Hong Kong Branch of Chinese National Engineering Research Center for Tissue Restoration & Reconstruction, Hong Kong University of Science and Technology, Clear Water Bay, Kowloon, Hong Kong

<sup>3</sup> School of Material Science and Engineering, Sun Yat-Sen University, No. 135 West Xingang Road, Guangzhou 510275, China

<sup>4</sup> Department of Physics, North Carolina State University, Raleigh, North Carolina 27695, United States

\*E-mail: hyan@ust.hk.

**Solar cell fabrication and testing.** Pre-patterned ITO-coated glass with a sheet resistance of  $\sim 15 \Omega$  per square was used as the substrate. It was cleaned by sequential sonications in soap deionized water, deionized water, acetone, and isopropanol for 30 min at each step. After UV/ozone treatment for 60 min, a ZnO electron transport layer was prepared by spin-coating at 5000 rpm from a ZnO precursor solution (diethyl zinc). Active layer solutions (D/A ratio 1:1.5, polymer concentration 8 mg/ml) were prepared in chlorobenzene (CB). To completely dissolve the polymer, the active layer solution should be stirred on hotplate at 90 °C for at least 1 hour. Before spin coating, both the polymer solution and ITO substrate are preheated on a hotplate at about 100 °C. Active layers were spin-coated from the warm polymer solution on the preheated substrate in a N<sub>2</sub> glovebox at 2000 rpm to obtain thicknesses of  $\sim 115$  nm. The polymer:SMA blend films were then thermally annealed before being transferred to the vacuum chamber of a thermal evaporator inside the same glovebox. At a vacuum level of  $3 \times 10^{-6}$  Torr, a thin layer (20 nm) of V<sub>2</sub>O<sub>5</sub> was deposited as the anode interlayer, followed by deposition of 100 nm of Al as the top electrode. All cells were encapsulated using epoxy inside the glovebox. Device J-V characteristics was measured in forward direction under AM1.5G (100 mW cm<sup>-2</sup>) at room temperature using a Newport solar simulator. The dwell times is 2 s and the speed is 0.8 V/s. The light intensity was calibrated using a standard Si diode (with KG5 filter, purchased from PV Measurement) to bring spectral mismatch to unity. J-V characteristics were recorded using a Keithley 236 source meter unit. Typical cells have devices area of 5.9 mm<sup>2</sup>, which is defined by a metal mask with an aperture aligned with the device area. EQE was characterized using a Newport EQE system equipped with a standard Si diode. Monochromatic light was generated from a Newport 300W lamp source.

**AFM analysis.** AFM measurements were acquired by using a Scanning Probe Microscope-Dimension 3100 in tapping mode. All film samples were spincoated on ITO/ZnO substrates.

**Optical characterizations.** Film ultraviolet–visible absorption spectra were acquired on a Perkin Elmer Lambda 20 ultraviolet/visible Spectrophotometer. All film samples were spincoated on ITO/ZnO substrates. Solution ultraviolet-visible absorption spectra at elevated temperatures were collected on a Perkin Elmer Lambda 950 ultraviolet/visible/NIR Spectrophotometer. The temperature of the cuvette was controlled with a Perkin Elmer PTP 6+6 Peltier System, which is supplied by a Perkin Elmer PCB 1,500 Water Peltier System. Before each measurement, the system was held for at least 5 min at the target temperature to reach thermal equilibrium. A cuvette with a stopper (Sigma Z600628) was used to avoid volatilization during the measurement.

**Cyclic voltammetry.** Cyclic voltammetry was performed in an electrolyte solution of 0.1M tetrabutylammonium hexafluorophosphate, both working and counter electrodes were platinum electrode. Ag/AgCl electrode was used as the reference electrode; the Fc/Fc<sup>+</sup> redox couple was used as an external standard.

**GIWAXS characterizations.** GIWAXS measurements<sup>1</sup> were performed at beamline 7.3.3 at the Advanced Light Source (ALS). Samples were prepared on Si substrates using identical blend solutions as those used in devices. The 10k eV X-ray beam was incident at a grazing angle of 0.13° -0.17°, which maximized the scattering intensity from the samples. The scattered X-rays were detected using a Dectris Pilatus 2 M photon counting detector.

**R-SoXS characterization.** R-SoXS transmission measurements were performed at beamline 11.0.1.2 at the

ALS.<sup>2</sup> Samples for R-SoXS measurements were prepared on a PSS modified Si substrate under the same conditions as those used for device fabrication, and then transferred by floating in water to a 1.5×1.5 mm, 100 nm thick Si<sub>3</sub>N<sub>4</sub> membrane supported by a 5×5 mm, 200 mm thick Si frame (Norcada Inc.). Two dimensional scattering patterns were collected on an in-vacuum CCD camera (Princeton Instrument PI-MTE). The beam size at the sample is ~100 mm by 200 mm. The composition variation (or relative domain purity) over the length scales probed can be extracted by integrating scattering profiles to yield the total scattering intensity. The median domain spacing is calculated from  $2\pi/q$ , where  $q$  here corresponds to half the total scattering intensity.<sup>3</sup> The purer the average domains are, the higher the total scattering intensity. Owing to a lack of absolute flux normalization, the absolute composition cannot be obtained by only R-SoXS.

**Hole-mobility measurements.** The hole-mobilities were measured using the SCLC method, employing a device architecture of ITO/V2O5/blend film/V2O5/Al. The mobilities were obtained by taking current-voltage curves and fitting the results to a space charge limited form, where the SCLC is described by:

$$J = \frac{9\varepsilon_0\varepsilon_r\mu(V_{appl} - V_{bi} - V_S)^2}{8L^3}$$

Where  $\varepsilon_0$  is the permittivity of free space,  $\varepsilon_r$  is the relative permittivity of the material (assumed to be 3),  $\mu$  is the hole mobility,  $V_{appl}$  is the applied voltage,  $V_{bi}$  is the built-in voltage (0V),  $V_S$  is the voltage drop from the substrate's series resistance ( $V_S = IR$ ,  $R$  is measured to be 10.8  $\Omega$ ) and  $L$  is the thickness of the film. By linearly fitting  $J^{1/2}$  with  $V_{appl} - V_{bi} - V_S$ , the mobilities were extracted from the slope and  $L$ :

$$\mu = \frac{slope^2 \times 8L^3}{9\varepsilon_0\varepsilon_r}$$

**Electron mobility measurements.** The electron mobilities were measured using the SCLC method, employing a device architecture of ITO/ZnO/blend film/Ca/Al. The mobilities were obtained by taking current-voltage curves and fitting the results to a space charge limited form, where the SCLC is described by:

$$J = \frac{9\varepsilon_0\varepsilon_r\mu(V_{appl} - V_{bi} - V_S)^2}{8L^3}$$

Where  $\varepsilon_0$  is the permittivity of free space,  $\varepsilon_r$  is the relative permittivity of the material (assumed to be 3),  $\mu$  is the hole mobility and  $L$  is the thickness of the film. From the plots of  $J^{1/2}$  versus  $V$ , electron mobilities can be deduced. The mobilities were extracted from the slope and  $L$ :

$$\mu = \frac{slope^2 \times 8L^3}{9\varepsilon_0\varepsilon_r}$$

**Molecular interaction parameter ( $\chi$ ) calculation.** We can obtain an estimate of the Flory-Huggins interaction parameter,  $\chi$ , following the Flory-Huggins equation:<sup>4, 5</sup>

$$\frac{1}{T_m} - \frac{1}{T_m^0} = \frac{R}{\Delta H_f} \frac{v_m}{v_s} (\Phi_s - \chi\Phi_s^2)$$

where  $T_m$  is the melting point of the mixture,  $T_m^0$  is the melting point of pure polymer,  $R$  is the ideal gas constant,  $\Delta H_f$  is the heat of fusion of pure polymer,  $\Phi_s$  is the volume fraction of the small molecule,  $v_m$  is the monomer molar volume of polymer and  $v_s$  is the solvent molar volume (polymer and small molecule density was found to be ~1.15 and ~1.3 g/cm<sup>3</sup>, respectively, and the small molecule is regarded as the solvent for the polymer). The molecular mass of the polymer divided by its density (1.15 g/cm<sup>3</sup>) is the monomer molar volume  $v_m$ .

The PT4FB:IDIC and PTT4FB:IDIC were dissolved in CB and stirred on hotplate at 90 °C for at least 1 hour

to guarantee sufficient mixing. The solvent of two solutions was then removed from the system at 90 °C, which is similar to the film processing temperature, to yield the solid of two blends for DSC characterizations. Based on the DSC data as shown in Fig. 5, interaction parameters  $\chi$  of 1.45 and 0.81 are calculated for the PT4FB:IDIC and PTT4FB:IDIC blends, respectively.

## Supplementary figures and tables

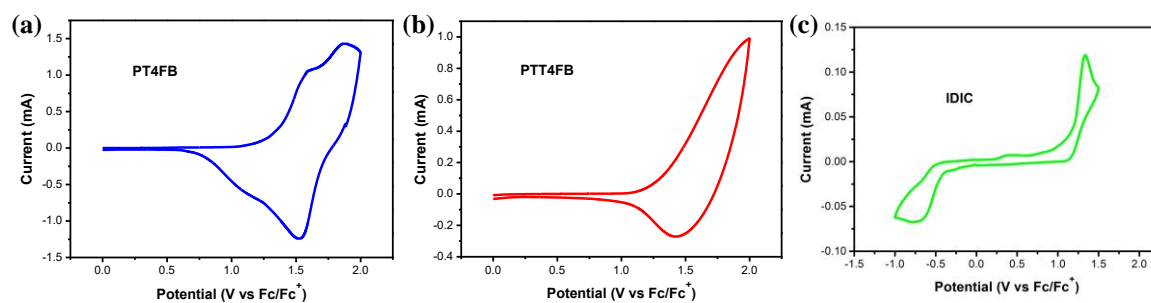

**Fig. S1** Cyclic voltammetry of (a) PT4FB, (b) PTT4FB and (c) IDIC.

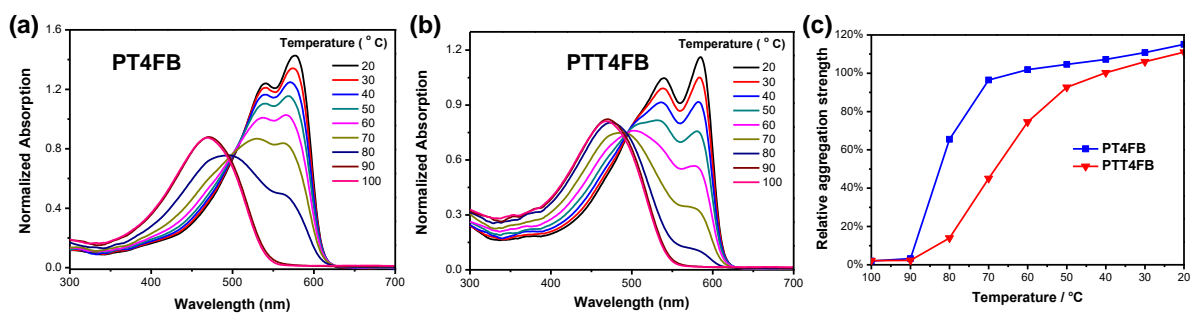

**Fig. S2** Temperature-dependent UV-vis absorption spectra of 0.02 mg/mL (a) PT4FB and (b) PTT4FB in chlorobenzene solutions. (c) “Relative aggregation strength” plots of PT4FB and PTT4FB in chlorobenzene solutions at different temperature. The “relative aggregation strength” is defined as the ratio of the second absorption peak to the first absorption peak in two polymer absorption curves.

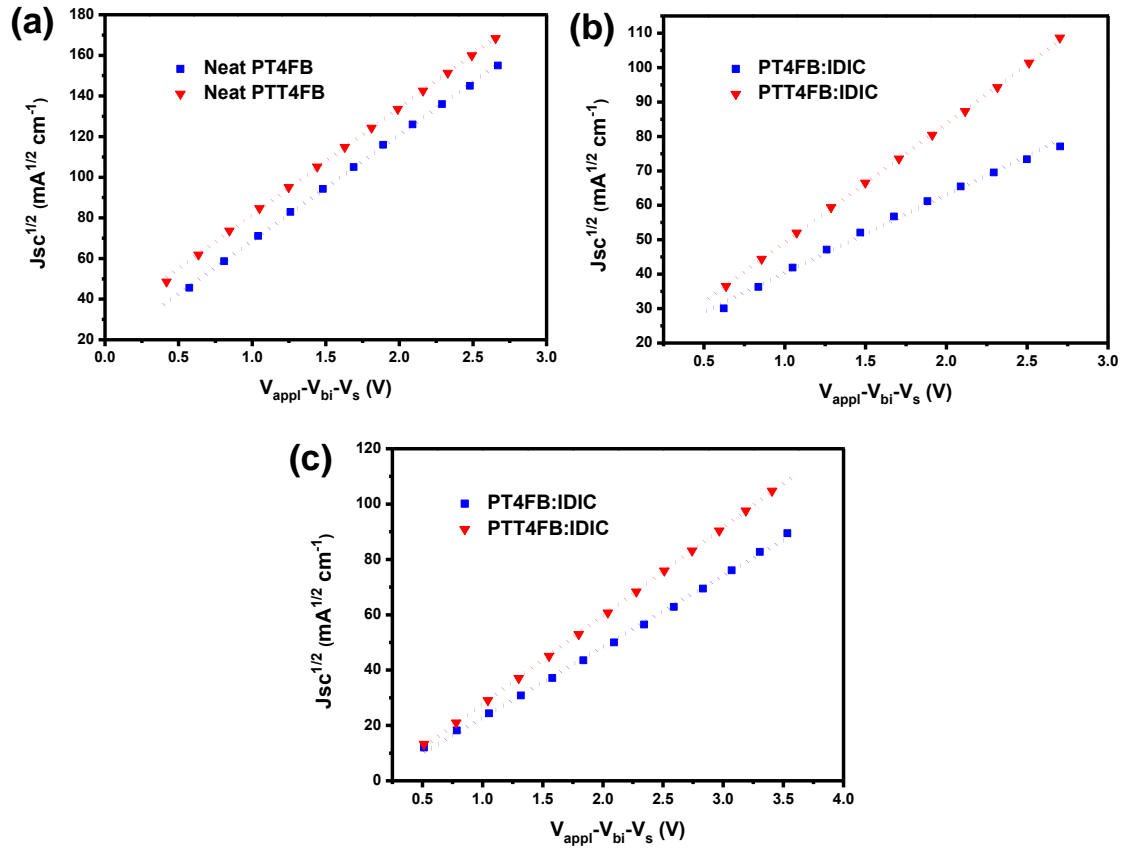

**Fig. S3**  $J^{1/2} \sim V_{appl} - V_{bi} - V_s$  characteristics of (a) hole-only for neat PT4FB and PTT4FB polymer films. (b) hole-only and (c) electron-only for PT4FB:IDIC and PTT4FB:IDIC devices. Dash lines are fits. The hole mobilities for two polymers PT4FB and PTT4FB are  $(1.57 \pm 0.12) \times 10^{-4} \text{ cm}^2 \text{ V}^{-1} \text{ S}^{-1}$  and  $(1.27 \pm 0.22) \times 10^{-4} \text{ cm}^2 \text{ V}^{-1} \text{ S}^{-1}$ . The hole and electron mobilities for PT4FB:IDIC blend are  $(7.00 \pm 0.33) \times 10^{-4} \text{ cm}^2 \text{ V}^{-1} \text{ S}^{-1}$  and  $(6.16 \pm 0.20) \times 10^{-4} \text{ cm}^2 \text{ V}^{-1} \text{ S}^{-1}$ , and are  $(5.67 \pm 0.22) \times 10^{-4} \text{ cm}^2 \text{ V}^{-1} \text{ S}^{-1}$  and  $(5.59 \pm 0.18) \times 10^{-4} \text{ cm}^2 \text{ V}^{-1} \text{ S}^{-1}$  for PTT4FB:IDIC blend, respectively.

**Table S1.** Thermal and optical properties of Donors.

| Materials | T <sub>m</sub> <sup>0</sup> (°C) | ΔH <sub>m</sub> (J/g) | λ <sub>onset</sub> (nm) | HOMO (eV) <sup>a)</sup> | LUMO (eV) <sup>b)</sup> |
|-----------|----------------------------------|-----------------------|-------------------------|-------------------------|-------------------------|
| PT4FB     | 293.38                           | 21.44                 | 625                     | -5.59                   | -3.61                   |
| PTT4FB    | 319.24                           | 23.79                 | 620                     | -5.58                   | -3.58                   |

a) is extracted from cyclic voltammetry results and b) is calculated from a) values and polymer optical band gaps.

**Table S2.** The ratio of 2<sup>nd</sup> peak and 1<sup>st</sup> peak extracted from the UV absorption curves of PT4FB and PTT4FB solutions.

| Temperature (°C) | PT4FB                                               |                                                     |                                                             | PTT4FB                                              |                                                     |                                                             |
|------------------|-----------------------------------------------------|-----------------------------------------------------|-------------------------------------------------------------|-----------------------------------------------------|-----------------------------------------------------|-------------------------------------------------------------|
|                  | Max. value <sup>a)</sup><br>at 1 <sup>st</sup> peak | Max. value <sup>a)</sup><br>at 2 <sup>nd</sup> peak | Ratio of 2 <sup>nd</sup><br>Peak to 1 <sup>st</sup><br>Peak | Max. value <sup>a)</sup><br>at 1 <sup>st</sup> peak | Max. value <sup>a)</sup><br>at 2 <sup>nd</sup> peak | Ratio of 2 <sup>nd</sup><br>Peak to 1 <sup>st</sup><br>Peak |
| 100              | 0.875                                               | 0.018                                               | <b>0.020</b>                                                | 0.812                                               | 0.018                                               | <b>0.022</b>                                                |
| 90               | 0.879                                               | 0.028                                               | <b>0.032</b>                                                | 0.823                                               | 0.019                                               | <b>0.023</b>                                                |
| 80               | 0.756                                               | 0.495                                               | <b>0.655</b>                                                | 0.804                                               | 0.113                                               | <b>0.140</b>                                                |
| 70               | 0.868                                               | 0.837                                               | <b>0.965</b>                                                | 0.749                                               | 0.338                                               | <b>0.451</b>                                                |
| 60               | 1.009                                               | 1.028                                               | <b>1.019</b>                                                | 0.760                                               | 0.567                                               | <b>0.746</b>                                                |
| 50               | 1.103                                               | 1.155                                               | <b>1.046</b>                                                | 0.817                                               | 0.757                                               | <b>0.927</b>                                                |
| 40               | 1.164                                               | 1.248                                               | <b>1.072</b>                                                | 0.915                                               | 0.917                                               | <b>1.003</b>                                                |
| 30               | 1.211                                               | 1.341                                               | <b>1.108</b>                                                | 0.991                                               | 1.051                                               | <b>1.060</b>                                                |
| 20               | 1.240                                               | 1.427                                               | <b>1.151</b>                                                | 1.047                                               | 1.162                                               | <b>1.110</b>                                                |

a) The max. values of 1<sup>st</sup> peak and 2<sup>nd</sup> peak are extracted from Fig. S2(a) and (b).

## Synthesis Section

**General information.** All reagents and solvents were purchased from commercial sources (Aldrich, Acros, solarmer and J&K) and used without further purification unless stated otherwise. Solvents were purified by distillation when necessary. IDIC, 4,7-bis(5-bromo-4-(2-decyltetradecyl)thiophen-2-yl)-5,6-difluoro-2-octyl-2H-benzo[d][1,2,3]triazole (1) and ((perfluoro-1,4-phenylene)bis(thiophene-5,2-diyl))bis(trimethylstannane) (2) were synthesized according to literature procedure.<sup>6-8</sup> Microwave assisted polymerizations were conducted in a CEM Discover microwave reactor. <sup>1</sup>H, <sup>19</sup>F and <sup>13</sup>C NMR spectra were recorded on a Bruker AV-400 MHz NMR spectrometer. Chemical shifts were reported in parts per million (ppm,  $\delta$ ). <sup>1</sup>H NMR and <sup>13</sup>C NMR spectra were referenced to tetramethylsilane (0 ppm) for CDCl<sub>3</sub>. Mass spectra were collected on a MALDI Micro MX mass spectrometer.

### Synthesis of PT4FB and PTT4FB

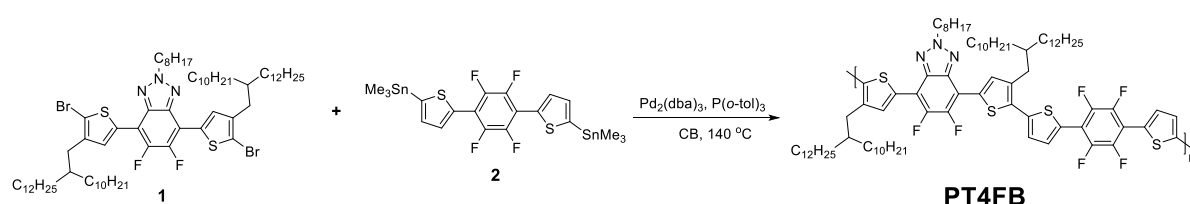

**Polymerization of PT4FB.** A mixture of 4,7-bis(5-bromo-4-(2-decyltetradecyl)thiophen-2-yl)-5,6-difluoro-2-octyl-2H-benzo[d][1,2,3]triazole (1) (31.6 mg, 0.025 mmol), ((perfluoro-1,4-phenylene)bis(thiophene-5,2-diyl))bis(trimethylstannane) (2) (16.0 mg, 0.025 mmol), Pd<sub>2</sub>(dba)<sub>3</sub> (1.1 mg, 0.00125 mmol) and P(*o*-tol)<sub>3</sub> (1.5 mg, 0.005 mmol) were added to a microwave vial equipped with a stirring bar and then 0.25 mL of chlorobenzene was added in a glove box protected with N<sub>2</sub>. The reaction mixture was then sealed and heated to 140 °C for one day by thermal heating. Then the mixture was cooled to room temperature and 20 mL of chlorobenzene was used to dissolve the mixture before the mixture was precipitated with methanol. The solid was collected by filtration, subsequently subjected to soxhlet extraction with acetone, hexane, chloroform and toluene. This toluene solution was then concentrated by rotary evaporator, precipitated into methanol. Finally it was collected by filtration and dried in vacuum to get the polymer as dark purple solid (20.1 mg, 57 %).

**GPC:** Mn: 56.2 kDa; Mw: 114.2 kDa; PDI=2.03.

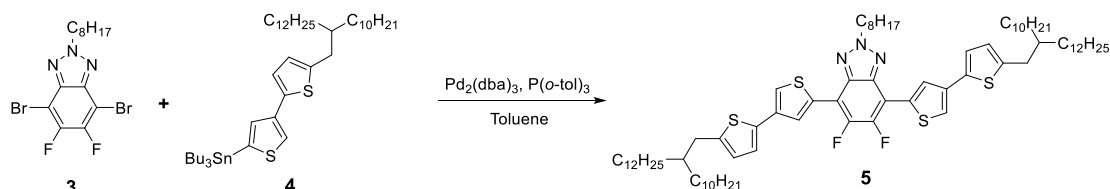

**4,7-bis(5-(2-decyltetradecyl)-[2,3'-bithiophen]-5'-yl)-5,6-difluoro-2-octyl-2H-benzo[d][1,2,3]triazole (5).** A mixture of 4,7-dibromo-5,6-difluoro-2-octyl-2H-benzo[d][1,2,3]triazole (3) (850 mg, 2 mmol), tributyl(5-(2-decyltetradecyl)-[2,3'-bithiophen]-5'-yl)stannane (4) (3484 mg, 4.4 mmol), Pd<sub>2</sub>(dba)<sub>3</sub> (92 mg, 0.1 mmol) and P(*o*-tol)<sub>3</sub> (122 mg, 0.4 mmol) were added to a flask. After adding 50 mL toluene, the mixture was refluxed at 100 °C overnight under N<sub>2</sub>. Then a solution of KF in water was added and the system was stirred for another half an hour. The reaction mixture was filtered, diluted with hexane and washed with KF solution,



water and brine. The organic layer was dried over Na<sub>2</sub>SO<sub>4</sub>, filtered and concentrated. Then the residue was purified with silica gel column chromatography by hexane to give the crude product of yellow oil (1904 mg, 75%).

**<sup>1</sup>H NMR** (400 MHz, CDCl<sub>3</sub>) δ 8.45 (d, *J* = 1.4 Hz, 2H), 7.46 (d, *J* = 1.3 Hz, 2H), 7.12 (d, *J* = 3.4 Hz, 2H), 6.72 (d, *J* = 3.5 Hz, 2H), 4.81 (t, *J* = 7.1 Hz, 2H), 2.77 (d, *J* = 6.6 Hz, 4H), 2.31 – 2.11 (m, 2H), 1.78 – 1.51 (m, 2H), 1.17 – 0.48 (m, 109 H), 1.10 – 0.48 (m, 15H).

**<sup>13</sup>C NMR** (101 MHz, CDCl<sub>3</sub>) δ 148.37 (d, *J* = 80.6 Hz), 146.03 (dd, *J* = 56.1, 43.4 Hz), 143.48 (d, *J* = 56.2 Hz), 138.22 – 137.52 (m), 136.73 (d, *J* = 7.2 Hz), 136.33 (d, *J* = 31.2 Hz), 132.71 (d, *J* = 45.5 Hz), 128.46 (d, *J* = 41.0 Hz), 125.70 (d, *J* = 41.5 Hz), 122.92 (d, *J* = 52.0 Hz), 121.22 (d, *J* = 33.4 Hz), 110.77 – 109.21 (m), 56.87 (d, *J* = 49.5 Hz), 40.09 (d, *J* = 26.9 Hz), 34.63 (d, *J* = 36.9 Hz), 33.20 (d, *J* = 46.9 Hz), 32.57 – 31.73 (m), 30.70 – 28.41 (m), 27.60 – 26.53 (m), 23.30 – 21.97 (m), 14.71 – 13.67 (m).

**<sup>19</sup>F NMR** (376 MHz, CDCl<sub>3</sub>) δ -133.62 (s).

**HRMS** (MALDI+) Calcd for C<sub>78</sub>H<sub>123</sub>F<sub>2</sub>N<sub>3</sub>S<sub>4</sub> (M<sup>+</sup>): 1267.8568, Found: 1267.8475.

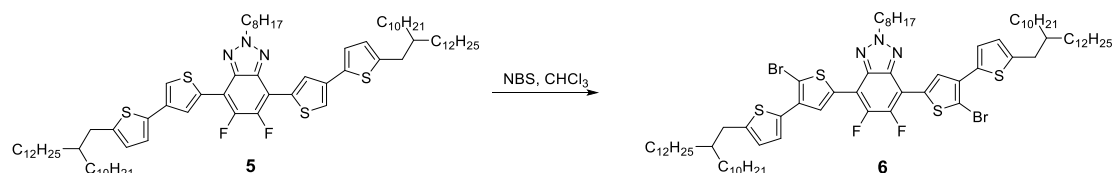

#### 4,7-bis(2'-bromo-5-(2-decyltetradecyl)-[2,3'-bithiophen]-5'-yl)-5,6-difluoro-2-octyl-2H-

**benzo[d][1,2,3]triazole (6).** Chemical **5** (1904 mg, 1.5 mmol) was added to a 100 mL flask. 30 mL chloroform was added to dissolve **5**. The N-Bromosuccinimide (534 mg, 3 mmol) was then added to the system at 0 °C. After reacting for two hours, the reaction mixture was warmed to r.t. and stirred overnight. 10 mL water was added to quench the reaction. After washing with water, the organic phase was dried with Na<sub>2</sub>SO<sub>4</sub> and the solvent was removed by rotary evaporator. Then the residue was purified with silica gel chromatography to get the pure product as yellow liquid (1.969 g, 92 % yield).

**<sup>1</sup>H NMR** (400 MHz, CDCl<sub>3</sub>) δ 8.25 (s, 2H), 7.37 (d, *J* = 3.6 Hz, 2H), 6.77 (d, *J* = 3.6 Hz, 2H), 4.80 (t, *J* = 7.1 Hz, 2H), 2.78 (d, *J* = 6.6 Hz, 4H), 2.32 – 2.04 (m, 2H), 1.86 – 0.84 (m, 96H), 0.87 (dd, *J* = 7.9, 5.6 Hz, 15H).

**<sup>13</sup>C NMR** (101 MHz, CDCl<sub>3</sub>) δ 148.66 (d, *J* = 13.3 Hz), 146.12 (d, *J* = 10.1 Hz), 145.12 (d, *J* = 26.0 Hz), 137.27 (s), 135.02 (d, *J* = 27.0 Hz), 134.11 (d, *J* = 15.9 Hz), 132.36 (d, *J* = 21.4 Hz), 130.50 (s), 126.17 (d, *J* = 15.9 Hz), 125.44 (d, *J* = 20.2 Hz), 110.70 (s), 109.42 (s), 57.09 (s), 40.09 (d, *J* = 24.5 Hz), 34.54 (d, *J* = 48.9 Hz), 33.39 (d, *J* = 13.7 Hz), 32.12 (d, *J* = 8.5 Hz), 31.90 (d, *J* = 19.1 Hz), 30.88 – 28.56 (m), 27.10 – 26.62 (m), 23.41 – 22.50 (m), 14.71 – 13.96 (m).

**<sup>19</sup>F NMR** (376 MHz, CDCl<sub>3</sub>) δ -133.66 (s).

**HRMS** (MALDI+) Calcd for C<sub>78</sub>H<sub>121</sub>Br<sub>2</sub>F<sub>2</sub>N<sub>3</sub>S<sub>4</sub> (M<sup>+</sup>): 1423.6778, Found: 1424.7444.

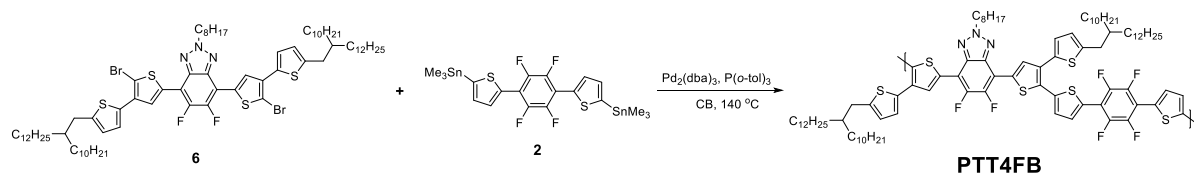

**Polymerization of PTT4FB.** A mixture of 4,7-bis(5-bromo-4-(2-decyltetradecyl)thiophen-2-yl)-5,6-difluoro-2-octyl-2H-benzo[d][1,2,3]triazole (6) (35.7 mg, 0.025 mmol), ((perfluoro-1,4-phenylene)bis(thiophene-5,2-diyl))bis(trimethylstannane) (2) (16.0 mg, 0.025 mmol), Pd<sub>2</sub>(dba)<sub>3</sub> (1.1 mg, 0.00125 mmol) and P(*o*-tol)<sub>3</sub> (1.5 mg, 0.005 mmol) were added to a microwave vial equipped with a stirring bar and then 0.25 mL of chlorobenzene was added in a glove box protected with N<sub>2</sub>. The reaction mixture was then sealed and heated to 140 °C for one day by thermal heating. Then the mixture was cooled to room temperature and 20 mL of chlorobenzene was used to dissolve the mixture before the mixture was precipitated with methanol. The solid was collected by filtration, subsequently subjected to soxhlet extraction with acetone, hexane and chloroform. This chloroform solution was then concentrated by rotary evaporator, precipitated into methanol. Finally it was collected by filtration and dried in vacuum to get the polymer as dark purple solid (24.9 mg, 63 %).

**GPC:** Mn: 54.1 kDa; Mw: 98.0 kDa; PDI=1.81.

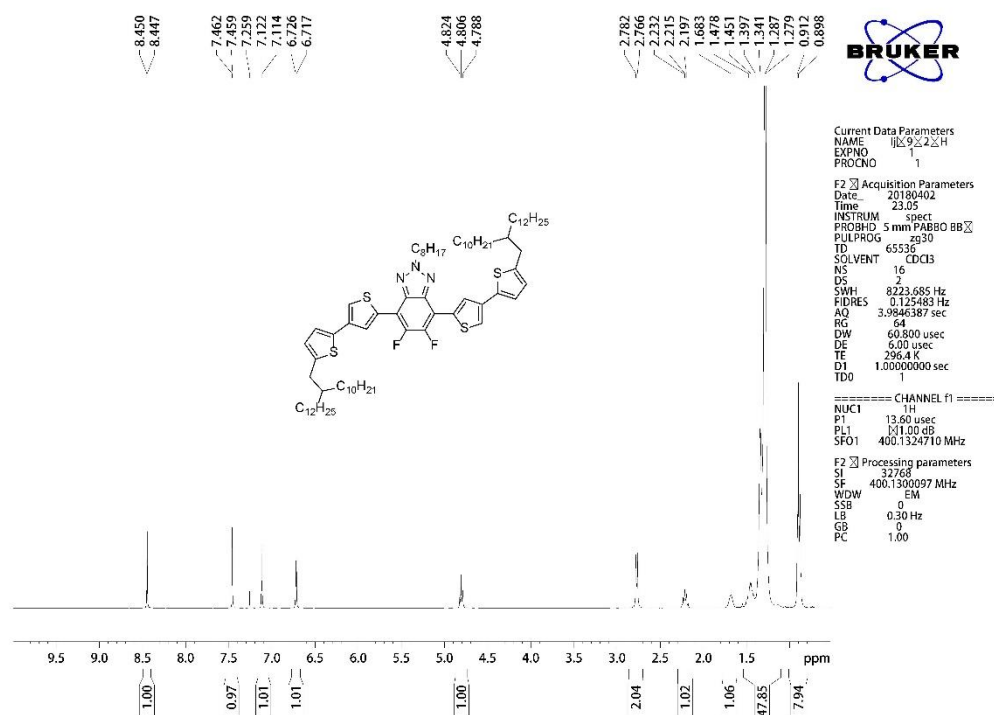

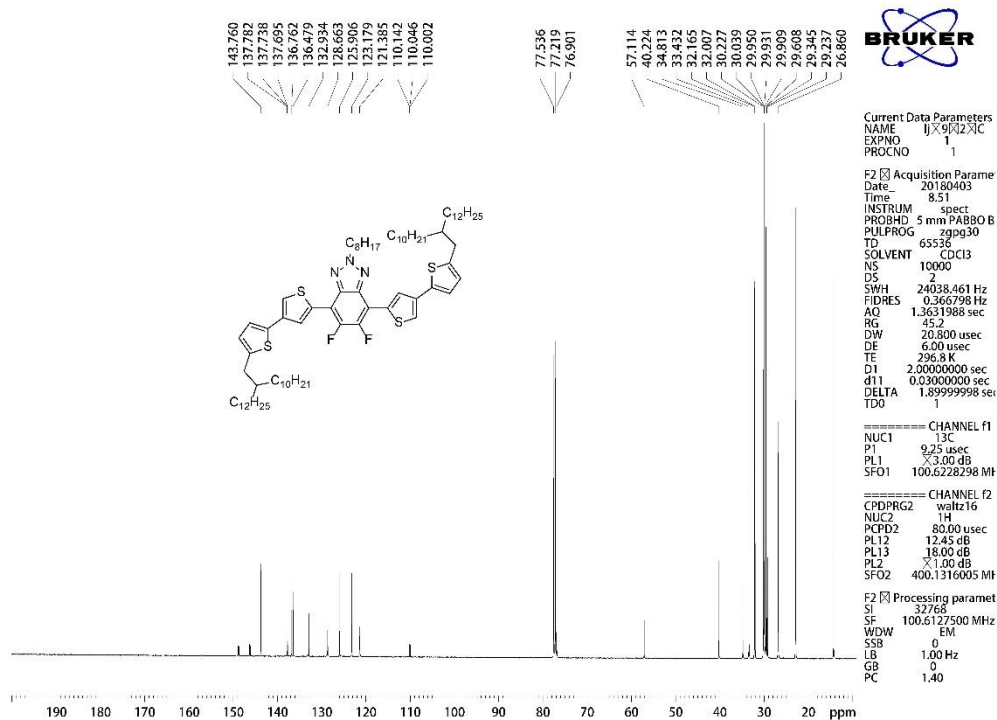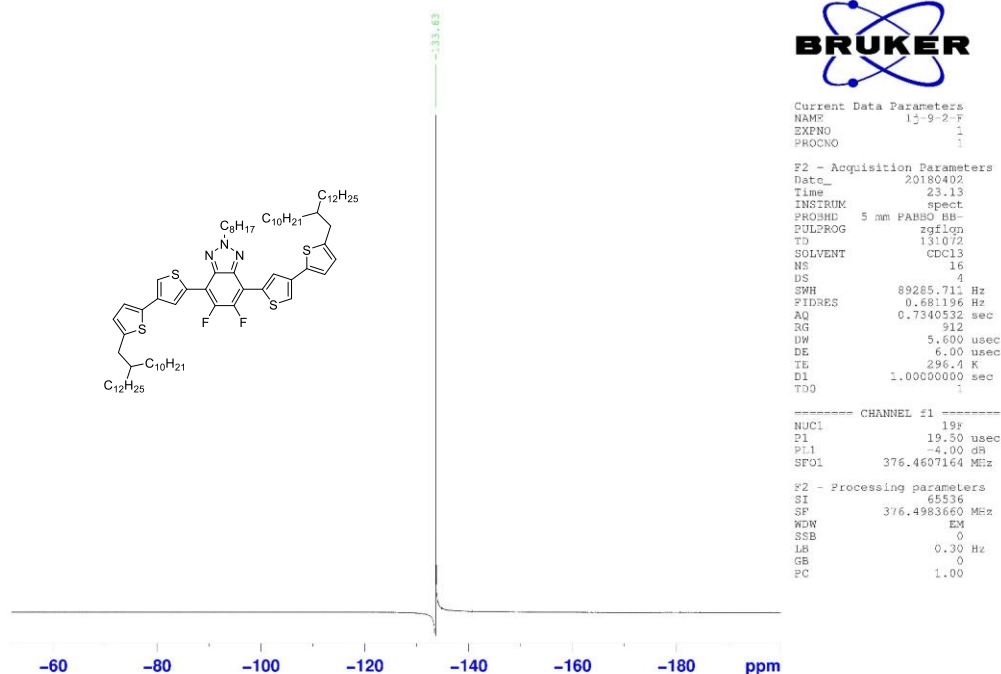

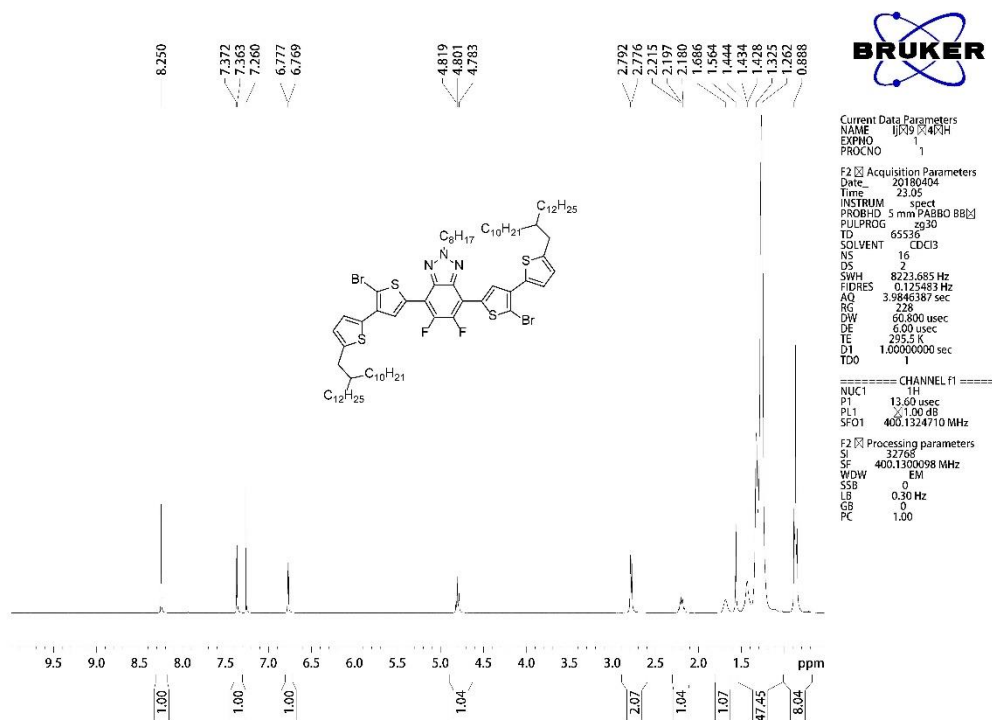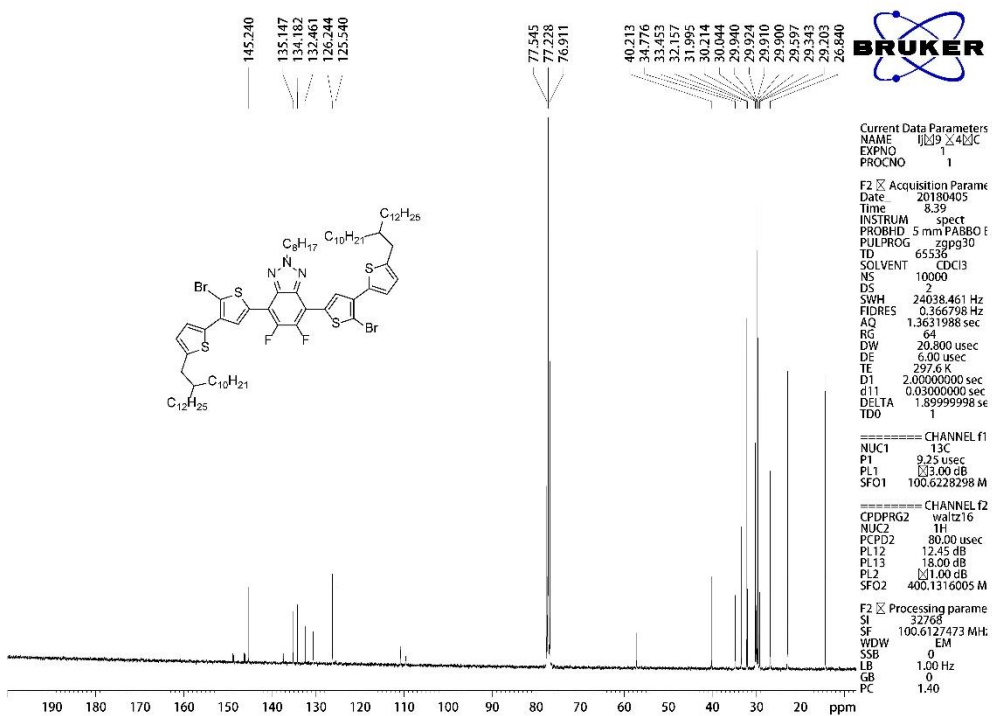

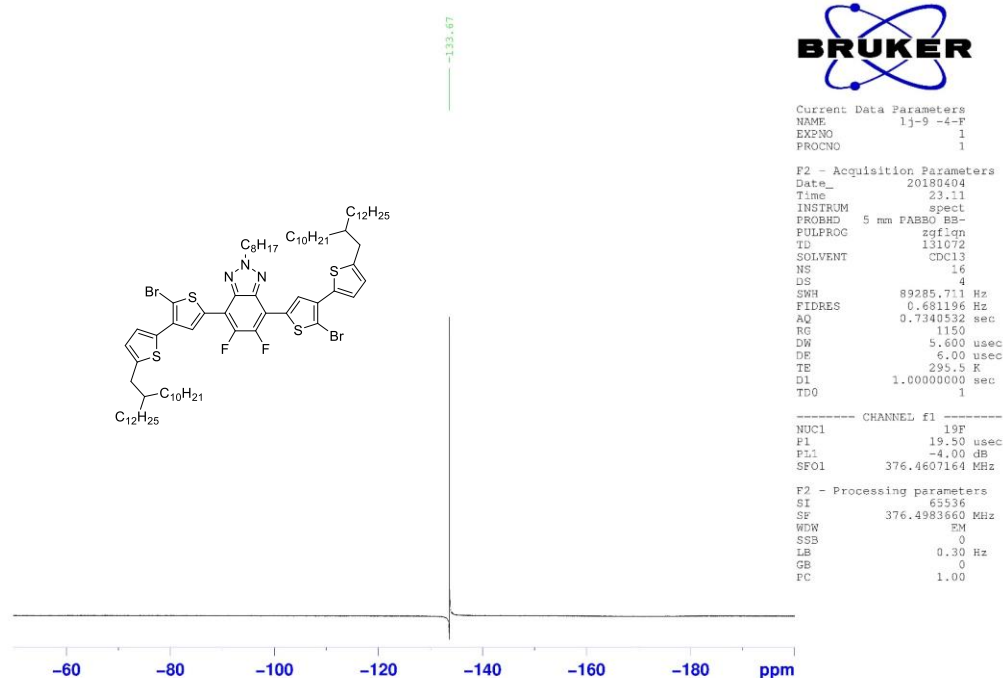

## References

- [1] H. Alexander, B. Wim, G. James, S. Eric, G. Eliot, K. Rick, M. Alastair, C. Matthew, R. Bruce, P. Howard, *J. Phys.: Conf. Ser.*, 2010, **247**, 012007.
- [2] E. Gann, A. T. Young, B. A. Collins, H. Yan, J. Nasiatka, H. A. Padmore, H. Ade, A. Hexemer, C. Wang, *Rev. Sci. Instrum.*, 2012, **83**, 045110.
- [3] J. R. Tumbleston, B. A. Collins, L. Yang, A. C. Stuart, E. Gann, W. Ma, W. You, H. Ade, *Nat. Photon.*, 2014, **8**, 385-391.
- [4] M. Ghasemi, L. Ye, Q. Zhang, L. Yan, J.-H. Kim, O. Awartani, W. You, A. Gadisa, H. Ade, *Adv. Mater.*, 2016, **29**, 1604603.
- [5] D. R. Kozub, K. Vakhshouri, L. M. Orme, C. Wang, A. Hexemer, E. D. Gomez, *Macromolecules*, 2011, **44**, 5722-5726.
- [6] Y. Lin, Q. He, F. Zhao, L. Huo, J. Mai, X. Lu, C.-J. Su, T. Li, J. Wang, J. Zhu, Y. Sun, C. Wang, X. Zhan, *J. Am. Chem. Soc.*, 2016, **138**, 2973-2976.
- [7] Z. Li, H. Lin, K. Jiang, J. Carpenter, Y. Li, Y. Liu, H. Hu, J. Zhao, W. Ma, H. Ade, H. Yan, *Nano Energy*, 2015, **15**, 607-615.
- [8] S.-J. Ko, Q. V. Hoang, C. E. Song, M. A. Uddin, E. Lim, S. Y. Park, B. H. Lee, S. Song, S.-J. Moon, S. Hwang, P.-O. Morin, M. Leclerc, G. M. Su, M. L. Chabinyc, H. Y. Woo, W. S. Shin, J. Y. Kim, *Energy Environ. Sci.*, 2017, **10**, 1443-1455.
